# Supplementary material
Source: MDPI journal article supplement (https://www.mdpi.com/1999-4907/14/5/901)
Supplement: s1 [file s1]

## Supplementary Materials

**Table S1.** Stomatal conductance model parameters, where  $g_{max}$  is maximum stomatal conductance,  $f_{min}$  is minimum conductance,  $f_{light\_a}$  is a parameter indicating the curvature of stomatal response curve to light,  $T_{max}$ ,  $T_{opt}$  and  $T_{min}$  are maximum, optimal and minimum temperature for describing the variation of  $g_s$  with temperature ( $f_{temp}$ ),  $VPD_{min}$  and  $VPD_{max}$  are the vapor pressure deficit for attaining minimum and maximum  $g_s$  ( $f_{VPD}$ ).

| Parameter   |                                                            |            | <i>Fagus sylvatica</i> | <i>Phillyrea</i> sp.       | <i>Picea abies</i> |
|-------------|------------------------------------------------------------|------------|------------------------|----------------------------|--------------------|
| $g_{max}$   | (mmol O <sub>3</sub> m <sup>-2</sup> PLA s <sup>-1</sup> ) |            | 145                    | 135                        | 130                |
| $f_{min}$   | (fraction)                                                 |            | 0.02                   | 0.02                       | 0.16               |
| $f_{light}$ | $a$                                                        | (constant) | 0.006                  | 0.0023                     | 0.01               |
| $f_{temp}$  | $T_{opt}$                                                  | (°C)       | 21                     | 22                         | 14                 |
|             | $T_{min}$                                                  | (°C)       | 4                      | 0                          | 0                  |
|             | $T_{max}$                                                  | (°C)       | 37                     | 40                         | 35                 |
| $f_{VPD}$   | $VPD_{max}$                                                | (kPa)      | 1.0                    | 1.3                        | 0.5                |
|             | $VPD_{min}$                                                | (kPa)      | 4.0                    | 5.4                        | 3.0                |
| Reference   |                                                            |            | CLRTAP (2017)          | Moura <i>et al.</i> (2022) | CLRTAP (2017)      |

| Parameter   |                                                            |            | <i>Pinus pinea</i>         | <i>Quercus</i> sp.<br>(Deciduous) | <i>Quercus ilex</i><br>(Evergreen) |
|-------------|------------------------------------------------------------|------------|----------------------------|-----------------------------------|------------------------------------|
| $g_{max}$   | (mmol O <sub>3</sub> m <sup>-2</sup> PLA s <sup>-1</sup> ) |            | 145                        | 265                               | 195                                |
| $f_{min}$   | (fraction)                                                 |            | 0.12                       | 0.13                              | 0.02                               |
| $f_{light}$ | $a$                                                        | (constant) | 0.0090                     | 0.0023                            | 0.012                              |
| $f_{temp}$  | $T_{opt}$                                                  | (°C)       | 26                         | 22                                | 23                                 |
|             | $T_{min}$                                                  | (°C)       | 7                          | 0                                 | 1                                  |
|             | $T_{max}$                                                  | (°C)       | 43                         | 40                                | 39                                 |
| $f_{VPD}$   | $VPD_{max}$                                                | (kPa)      | 1.5                        | 1.3                               | 2.2                                |
|             | $VPD_{min}$                                                | (kPa)      | 6.1                        | 5.4                               | 4.0                                |
| Reference   |                                                            |            | Moura <i>et al.</i> (2022) | CLRTAP (2017)                     | CLRTAP (2017)                      |

| Parameter          |                                                            |            | <i>Populus maximowiczii</i><br>Henry X P. ×<br><i>berolinensis</i> Dippel | <i>Populus x</i><br><i>euramericana</i> I-214 | <i>Arbutus unedo</i>       |
|--------------------|------------------------------------------------------------|------------|---------------------------------------------------------------------------|-----------------------------------------------|----------------------------|
| $g_{\max}$         | (mmol O <sub>3</sub> m <sup>-2</sup> PLA s <sup>-1</sup> ) |            | 348                                                                       | 478                                           | 95                         |
| $f_{\min}$         |                                                            | (fraction) | 0.08                                                                      | 0.06                                          | 0.16                       |
| $f_{\text{light}}$ | $a$                                                        | (constant) | 0.0083                                                                    | 0.0033                                        | 0.0015                     |
| $f_{\text{temp}}$  | T <sub>opt</sub>                                           | (°C)       | 29                                                                        | 28                                            | 22                         |
|                    | T <sub>min</sub>                                           | (°C)       | 15                                                                        | 15                                            | 6                          |
|                    | T <sub>max</sub>                                           | (°C)       | 42                                                                        | 40                                            | 50                         |
| $f_{\text{VPD}}$   | VPD <sub>max</sub>                                         | (kPa)      | 1.8                                                                       | 1.8                                           | 1.2                        |
|                    | VPD <sub>min</sub>                                         | (kPa)      | 5.3                                                                       | 3.7                                           | 6.9                        |
| Reference          |                                                            |            | Modified after<br>Hoshika <i>et al.</i> (2018)                            | Hoshika <i>et al.</i> ,<br>unpublished        | Moura <i>et al.</i> , 2022 |

| Parameter          |                                                            |            | <i>Alnus glutinosa</i>        | <i>Sorbus aucuparia</i>       |
|--------------------|------------------------------------------------------------|------------|-------------------------------|-------------------------------|
| $g_{\max}$         | (mmol O <sub>3</sub> m <sup>-2</sup> PLA s <sup>-1</sup> ) |            | 300                           | 240                           |
| $f_{\min}$         |                                                            | (fraction) | 0.13                          | 0.17                          |
| $f_{\text{light}}$ | $a$                                                        | (constant) | 0.0024                        | 0.0043                        |
| $f_{\text{temp}}$  | T <sub>opt</sub>                                           | (°C)       | 29                            | 23                            |
|                    | T <sub>min</sub>                                           | (°C)       | 5                             | 0                             |
|                    | T <sub>max</sub>                                           | (°C)       | 40                            | 40                            |
| $f_{\text{VPD}}$   | VPD <sub>max</sub>                                         | (kPa)      | 1.8                           | 1.2                           |
|                    | VPD <sub>min</sub>                                         | (kPa)      | 5.7                           | 7.0                           |
| Reference          |                                                            |            | Hoshika <i>et al.</i> (2020a) | Hoshika <i>et al.</i> (2020a) |

| Parameter          |                                                            |            | <i>Rubus</i> spp.          | <i>Vaccinium myrtillus</i>    |
|--------------------|------------------------------------------------------------|------------|----------------------------|-------------------------------|
| $g_{\max}$         | (mmol O <sub>3</sub> m <sup>-2</sup> PLA s <sup>-1</sup> ) |            | 165                        | 140                           |
| $f_{\min}$         |                                                            | (fraction) | 0.23                       | 0.17                          |
| $f_{\text{light}}$ | $a$                                                        | (constant) | 0.0034                     | 0.104                         |
| $f_{\text{temp}}$  | T <sub>opt</sub>                                           | (°C)       | 25                         | 20                            |
|                    | T <sub>min</sub>                                           | (°C)       | 15                         | 5                             |
|                    | T <sub>max</sub>                                           | (°C)       | 43                         | 40                            |
| $f_{\text{VPD}}$   | VPD <sub>max</sub>                                         | (kPa)      | 1.3                        | 1.2                           |
|                    | VPD <sub>min</sub>                                         | (kPa)      | 4.9                        | 4.7                           |
| Reference          |                                                            |            | Moura <i>et al.</i> (2022) | Hoshika <i>et al.</i> (2020a) |

**Table S2.** Leaf Mass per Area (mean  $\pm$  standard error, n=3) for the species found in MOTTLES sites.

| Species                    | Site | LMA (g m <sup>-2</sup> ) |
|----------------------------|------|--------------------------|
| <i>Fagus sylvatica</i>     | PIE1 | 61.04 $\pm$ 3.72         |
| <i>Fagus sylvatica</i>     | VEN1 | 50.42 $\pm$ 4.38         |
| <i>Fagus sylvatica</i>     | ABR1 | 67.01 $\pm$ 3.22         |
| <i>Quercus petraea</i>     | EMI1 | 82.27 $\pm$ 3.54         |
| <i>Quercus cerris</i>      | LAZ1 | 96.20 $\pm$ 5.03         |
| <i>Quercus ilex</i>        | CPZ1 | 142.65 $\pm$ 6.38        |
| <i>Phillyrea latifolia</i> | CPZ2 | 144.64 $\pm$ 5.80        |
| <i>Pinus pinea</i>         | CPZ3 | 192.47 $\pm$ 2.08        |
| <i>Picea abies</i>         | TRE1 | 262.10 $\pm$ 17.44       |
| <i>Rubus</i> spp.          | ABR1 | 76.83 $\pm$ 3.43         |
| <i>Rubus</i> spp.          | EMI1 | 62.62 $\pm$ 1.27         |
| <i>Rubus</i> spp.          | LAZ1 | 78.29 $\pm$ 3.06         |
| <i>Rubus</i> spp.          | PIE1 | 55.20 $\pm$ 5.64         |
| <i>Rubus</i> spp.          | CPZ3 | 71.13 $\pm$ 6.27         |
| <i>Vaccinium myrtillus</i> | PIE1 | 55.76 $\pm$ 7.87         |
| <i>Vaccinium myrtillus</i> | TRE1 | 34.60 $\pm$ 5.69         |

**Table S3.** Leaf Mass per Area (mean  $\pm$  standard error) for the species subjected to O<sub>3</sub> fumigation in FACE experiment.

| Year | Species                                                               | O <sub>3</sub> treatment | LMA (g m <sup>-2</sup> ) |
|------|-----------------------------------------------------------------------|--------------------------|--------------------------|
| 2016 | <i>Populus maximowiczii</i> Henry $\times$ <i>berolinensis</i> Dippel | Ambient Air              | 83.77 $\pm$ 3.3          |
|      |                                                                       | 1.5x                     | 78.30 $\pm$ 2.5          |
|      |                                                                       | 2.0x                     | 92.60 $\pm$ 3.5          |
| 2017 | <i>Arbutus unedo</i>                                                  | Ambient Air              | 133.12 $\pm$ 1.9         |
|      |                                                                       | 1.5x                     | 126.33 $\pm$ 10.6        |
|      |                                                                       | 2.0x                     | 134.45 $\pm$ 5.4         |
| 2018 | <i>Phillyrea angustifolia</i>                                         | Ambient Air              | 176.04 $\pm$ 7.8         |
|      |                                                                       | 1.5x                     | 209.41 $\pm$ 6.8         |
|      |                                                                       | 2.0x                     | 178.15 $\pm$ 6.1         |
| 2018 | <i>Vaccinium myrtillus</i>                                            | Ambient Air              | 75.90 $\pm$ 2.9          |
|      |                                                                       | 2.0x                     | 85.43 $\pm$ 11.0         |
| 2018 | <i>Sorbus aucuparia</i>                                               | Ambient Air              | 94.33 $\pm$ 4.5          |
|      |                                                                       | 2.0x                     | 86.30 $\pm$ 3.8          |
| 2018 | <i>Alnus glutinosa</i>                                                | Ambient Air              | 48.40 $\pm$ 2.9          |
|      |                                                                       | 2.0x                     | 48.00 $\pm$ 2.8          |
| 2019 | <i>Pinus pinea</i>                                                    | Ambient Air              | 232.85 $\pm$ 8.7         |
|      |                                                                       | 1.5x                     | 260.76 $\pm$ 9.0         |
|      |                                                                       | 2.0x                     | 278.16 $\pm$ 21.0        |
| 2020 | <i>Populus maximowiczii</i> Henry $\times$ <i>berolinensis</i> Dippel | Ambient Air              | 80.95 $\pm$ 5.2          |
|      |                                                                       | 1.5x                     | 76.96 $\pm$ 7.8          |
|      |                                                                       | 2.0x                     | 78.29 $\pm$ 2.4          |
| 2020 | <i>Populus x euramericana</i> I-214                                   | Ambient Air              | 94.21 $\pm$ 4.8          |
|      |                                                                       | 1.5x                     | 88.91 $\pm$ 3.3          |
|      |                                                                       | 2.0x                     | 73.82 $\pm$ 9.1          |

**Table S4.** Values of AOT40 and POD<sub>1</sub> calculated in each site for the period 2018-2022.

| Species                    | Site | Year | AOT40<br>(ppb·h) | POD <sub>1</sub><br>(mmol m <sup>-2</sup> ) |
|----------------------------|------|------|------------------|---------------------------------------------|
| <i>Fagus sylvatica</i>     | ABR1 | 2022 | 25295            | 7.99                                        |
|                            | PIE1 | 2022 | 31469            | 11.16                                       |
|                            | VEN1 | 2022 | 16889            | 24.06                                       |
|                            | ABR1 | 2021 | 30181            | 6.43                                        |
|                            | PIE1 | 2021 | 25227            | 21.65                                       |
|                            | VEN1 | 2021 | 19257            | 25.27                                       |
|                            | ABR1 | 2020 | 22587            | 6.92                                        |
|                            | PIE1 | 2020 | 17926            | 19.32                                       |
|                            | VEN1 | 2020 | 17536            | 24.14                                       |
|                            | ABR1 | 2019 | 31216            | 12.56                                       |
|                            | PIE1 | 2019 | 29505            | 21.73                                       |
|                            | VEN1 | 2019 | 22449            | 24.12                                       |
|                            | ABR1 | 2018 | 54588            | 22.33                                       |
|                            | PIE1 | 2018 | 34310            | 18.67                                       |
|                            | VEN1 | 2018 | 25974            | 30.88                                       |
| <i>Rubus</i> spp.          | ABR1 | 2022 | 25295            | 6.61                                        |
|                            | CPZ3 | 2022 | 8377             | 4.88                                        |
|                            | EMI1 | 2022 | 36664            | 9.24                                        |
|                            | LAZ1 | 2022 | 36876            | 8.70                                        |
|                            | PIE1 | 2022 | 31469            | 9.97                                        |
|                            | CPZ3 | 2021 | 19916            | 7.67                                        |
|                            | EMI1 | 2021 | 24044            | 7.72                                        |
|                            | LAZ1 | 2021 | 23404            | 7.05                                        |
|                            | PIE1 | 2021 | 25227            | 11.10                                       |
|                            | CPZ3 | 2020 | 38369            | 14.69                                       |
|                            | EMI1 | 2020 | 20281            | 6.15                                        |
|                            | LAZ1 | 2020 | 18023            | 6.23                                        |
|                            | LAZ1 | 2019 | 25908            | 7.83                                        |
|                            | ABR1 | 2018 | 54588            | 12.45                                       |
|                            | EMI1 | 2018 | 35086            | 11.25                                       |
|                            | LAZ1 | 2018 | 35657            | 9.81                                        |
| <i>Vaccinium myrtillus</i> | PIE1 | 2022 | 31469            | 13.09                                       |
|                            | TRE1 | 2022 | 14261            | 19.91                                       |
|                            | PIE1 | 2021 | 25227            | 23.29                                       |
|                            | TRE1 | 2021 | 16612            | 28.47                                       |
|                            | TRE1 | 2020 | 12057            | 26.83                                       |
|                            | TRE1 | 2019 | 29505            | 23.21                                       |
|                            | PIE1 | 2018 | 34310            | 20.34                                       |
| <i>Pinus pinea</i>         | CPZ3 | 2022 | 8377             | 2.55                                        |

|                            |      |      |       |       |
|----------------------------|------|------|-------|-------|
|                            | CPZ3 | 2021 | 19916 | 5.75  |
|                            | CPZ3 | 2020 | 38369 | 19.28 |
|                            | CPZ3 | 2019 | 29273 | 10.77 |
|                            | CPZ3 | 2018 | 25924 | 20.81 |
| <i>Picea abies</i>         | TRE1 | 2022 | 14261 | 18.12 |
|                            | TRE1 | 2021 | 16612 | 33.01 |
|                            | TRE1 | 2020 | 12057 | 30.19 |
|                            | TRE1 | 2019 | 18778 | 23.72 |
|                            | TRE1 | 2018 | 38970 | 21.78 |
| <i>Quercus petraea</i>     | EMI1 | 2022 | 36664 | 12.09 |
|                            | EMI1 | 2021 | 24044 | 13.59 |
|                            | EMI1 | 2020 | 20281 | 7.73  |
|                            | EMI1 | 2019 | 28276 | 14.60 |
|                            | EMI1 | 2018 | 35086 | 16.51 |
| <i>Quercus cerris</i>      | LAZ1 | 2022 | 36876 | 11.69 |
|                            | LAZ1 | 2021 | 23404 | 11.40 |
|                            | LAZ1 | 2020 | 18023 | 8.89  |
|                            | LAZ1 | 2019 | 25908 | 14.73 |
|                            | LAZ1 | 2018 | 35657 | 15.66 |
| <i>Quercus ilex</i>        | CPZ1 | 2022 | 8377  | 0.76  |
|                            | CPZ1 | 2021 | 19916 | 9.93  |
|                            | CPZ1 | 2020 | 38369 | 4.34  |
|                            | CPZ1 | 2019 | 29273 | 6.88  |
|                            | CPZ1 | 2018 | 25924 | 10.78 |
| <i>Phillyrea latifolia</i> | CPZ3 | 2022 | 8377  | 1.40  |
|                            | CPZ3 | 2020 | 38369 | 15.91 |
|                            | CPZ3 | 2019 | 29273 | 7.42  |
|                            | CPZ3 | 2018 | 25924 | 14.04 |
|                            | CPZ2 | 2022 | 8377  | 0.33  |
|                            | CPZ2 | 2021 | 19916 | 3.53  |
|                            | CPZ2 | 2020 | 38369 | 1.21  |
|                            | CPZ2 | 2019 | 29273 | 2.24  |
|                            | CPZ2 | 2018 | 25924 | 4.05  |

**Table S5.** Species subjected to fumigation in O<sub>3</sub> FACE (years 2016 – 2020). For each species O<sub>3</sub> treatment (Ambient Air, 1.5x, 2.0x), AOT40, POD<sub>1</sub> and LIF are reported.

| Year | Species                                                                | O <sub>3</sub> treatment | AOT40<br>(ppb·h) | POD <sub>1</sub><br>(mmol m <sup>-2</sup> ) | LIF<br>(mmol g <sup>-1</sup> ) |
|------|------------------------------------------------------------------------|--------------------------|------------------|---------------------------------------------|--------------------------------|
| 2016 | <i>Populus maximowiczii</i> Henry X<br><i>P. × berolinensis</i> Dippel | Ambient Air              | 13774            | 37.03                                       | 0.44                           |
|      |                                                                        | 1.5x                     | 39637            | 53.23                                       | 0.68                           |
|      |                                                                        | 2.0x                     | 68698            | 75.15                                       | 0.81                           |
| 2017 | <i>Arbutus unedo</i>                                                   | Ambient Air              | 22723            | 2.79                                        | 0.02                           |
|      |                                                                        | 1.5x                     | 42247            | 4.48                                        | 0.04                           |
|      |                                                                        | 2.0x                     | 59974            | 6.13                                        | 0.05                           |
| 2018 | <i>Phillyrea angustifolia</i>                                          | Ambient Air              | 18377            | 7.97                                        | 0.05                           |
|      |                                                                        | 1.5x                     | 47198            | 13.76                                       | 0.07                           |
|      |                                                                        | 2.0x                     | 72839            | 18.55                                       | 0.10                           |
| 2018 | <i>Vaccinium myrtillus</i>                                             | Ambient Air              | 11525            | 4.55                                        | 0.06                           |
|      |                                                                        | 2.0x                     | 43961            | 10.8                                        | 0.13                           |
| 2018 | <i>Sorbus aucuparia</i>                                                | Ambient Air              | 17257            | 17.67                                       | 0.19                           |
|      |                                                                        | 2.0x                     | 65713            | 36.04                                       | 0.42                           |
| 2018 | <i>Alnus glutinosa</i>                                                 | Ambient Air              | 11221            | 14.51                                       | 0.30                           |
|      |                                                                        | 2.0x                     | 43110            | 28.56                                       | 0.60                           |
| 2019 | <i>Pinus pinea</i>                                                     | Ambient Air              | 24243            | 18.03                                       | 0.08                           |
|      |                                                                        | 1.5x                     | 59140            | 28.66                                       | 0.11                           |
|      |                                                                        | 2.0x                     | 79646            | 35.03                                       | 0.13                           |
| 2020 | <i>Populus maximowiczii</i> Henry X<br><i>P. × berolinensis</i> Dippel | Ambient Air              | 17950            | 31.65                                       | 0.39                           |
|      |                                                                        | 1.5x                     | 41098            | 46.09                                       | 0.60                           |
|      |                                                                        | 2.0x                     | 74479            | 65.46                                       | 0.84                           |
| 2020 | <i>Populus x euramericana</i> I-214                                    | Ambient Air              | 17950            | 27.94                                       | 0.30                           |
|      |                                                                        | 1.5x                     | 41098            | 40.9                                        | 0.46                           |
|      |                                                                        | 2.0x                     | 74479            | 57.87                                       | 0.78                           |

# LESS and ITP

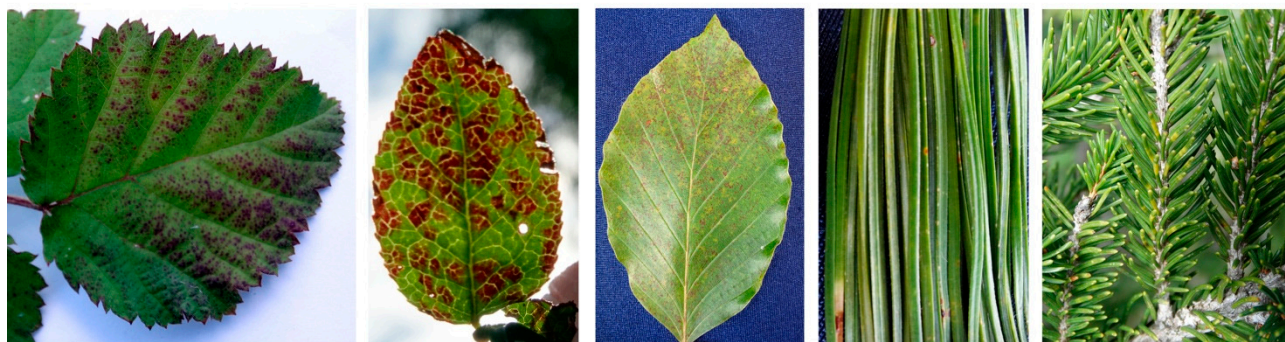

*Rubus* spp

*Vaccinium myrtillus*

*Fagus sylvatica*

*Pinus pinea*

*Picea abies*

# FACE

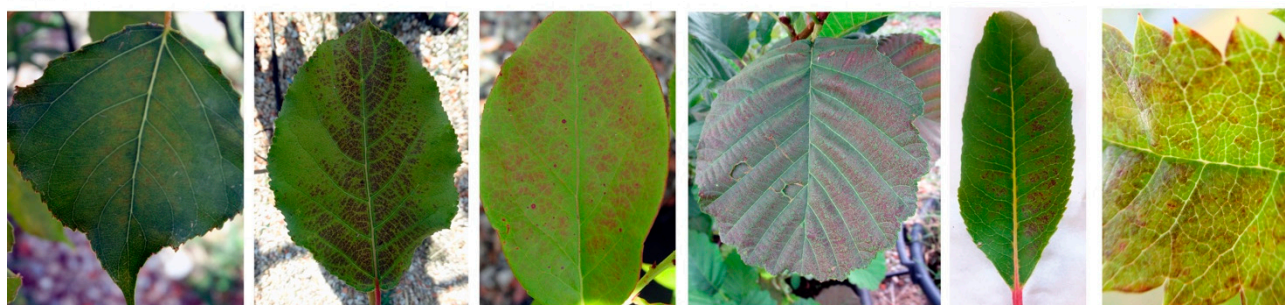

*Populus X*  
*euramericana* I-214

*Populus maximowiczii* Henry X  
*P. x berolinensis* Dippel

*Vaccinium myrtillus*

*Alnus glutinosa*

*Arbutus unedo*

*Sorbus aucuparia*

**Figure S1.** Species-specific O<sub>3</sub> VFI recorded during field surveys (LESS and ITP) and FACE experiment.
